# Supplementary material
Source: ML conference proceedings conference paper supplement (https://openreview.net/forum?id=Eal_lL08v_l)
Supplement: supplementary_material [file attachment]

# Transformers are adaptable task planners

Anonymous Author(s)

Affiliation

Address

email

1 **Code:** [https://anonymous.4open.science/r/temporal\\_task\\_planner-Paper148/](https://anonymous.4open.science/r/temporal_task_planner-Paper148/)

## 2 **A Hardware Experiments**

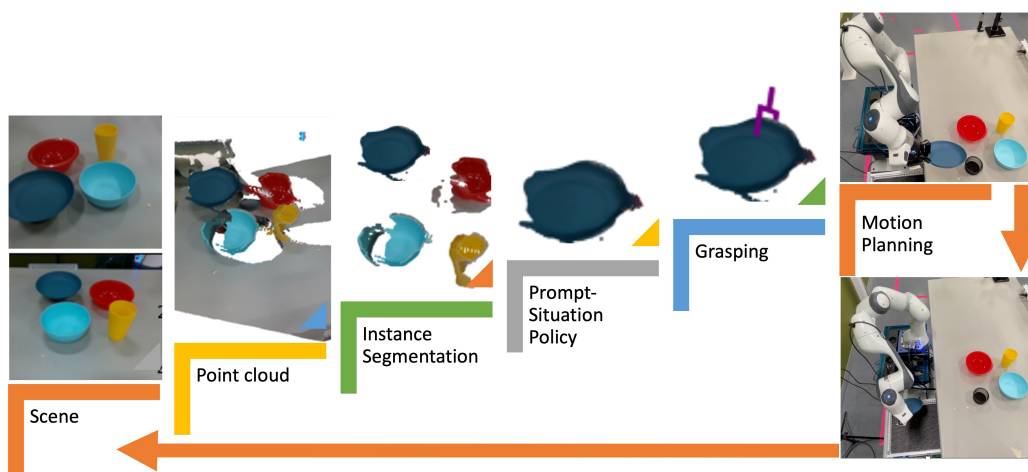

Figure 1: Pipeline for Real Hardware Experiments

### 3 **A.1 Real-world prompt demonstration**

4 Here we describe how we collected and processed a visual, human demonstration in the real-world  
5 to treat as a prompt for the trained TTP policy (Fig. 2). Essentially, we collect demonstration  
6 pointcloud sequences and manually segment them into different pick-place segments, followed by  
7 extracting object states. At each high-level step, we measure the state using three RealSense RGBD  
8 cameras[1], which are calibrated to the robot frame of reference using ARTags [2]. The camera  
9 output, extrinsics, and intrinsics are combined using Open3D [3] to generate a combined pointcloud.  
10 This pointcloud is segmented and clustered to give objects' pose and category using the algorithm  
11 from [4] and DBScan. For each object point cloud cluster, we identify the object pose based on the  
12 mean of the point cloud. For category information we use median RGB value of the pointcloud,  
13 and map it to apriori known set of objects. In the future this can be replaced by more advanced  
14 techniques like MaskRCNN [5]. Placement poses are approximated as a fixed, known location, as  
15 the place action on hardware is a fixed 'drop' position and orientation. The per step state of the  
16 objects is used to create the input prompt tokens used to condition the policy rollout in the real-  
17 world, as described in Section 3.2.

### 18 **A.2 Hardware policy rollout**

19 We zero-shot transfer our policy  $\pi$  trained in simulation to robotic hardware, by assuming low-  
20 level controllers. We use a Franka Panda equipped with a Robotiq 2F-85 gripper, controlled using

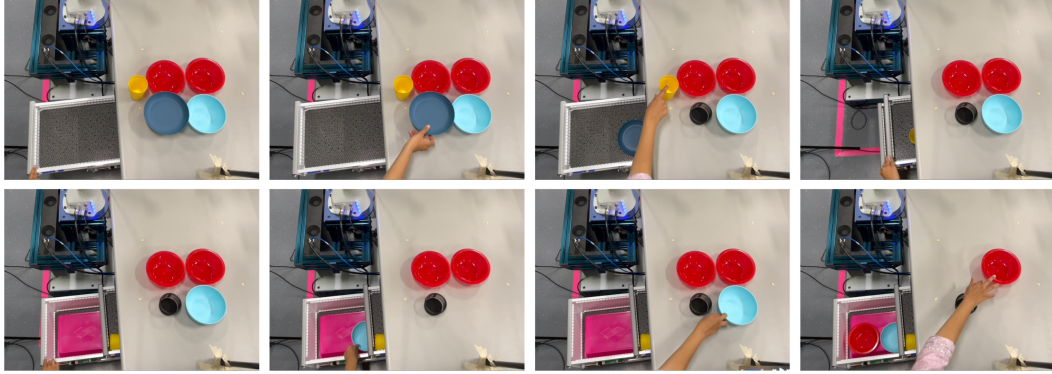

Figure 2: Human demonstration of real-world rearrangement of household dishes.

21 the Polymetis control framework [6]. Our hardware setup mirrors our simulation, with different  
 22 categories of dishware (bowls, cups, plates) on a table, a “dishwasher” (cabinet with two drawers).  
 23 The objective is to select an object to pick and place it into a drawer (rack) (see Fig. 2).

24 Once we collect the human prompt demonstration tokens, we can use them to condition the learned  
 25 policy  $\pi$  from simulation. Converting the hardware state to tokens input to  $\pi$  follows the same  
 26 pipeline as the ones used for collecting human demonstrations. At each step, the scene is captured  
 27 using 3 Realsense cameras, and the combined pointcloud is segmented and clustered to get object  
 28 poses and categories. This information along with the timestep is used to generate instance tokens  
 29 as described in Section 2 for all objects visible to the cameras. For visible already placed objects,  
 30 the place pose is approximated as a fixed location. The policy  $\pi$ , conditioned on the human demo,  
 31 reasons about the state of the environment, and chooses which object to pick. Next, we use a grasp  
 32 generator from [7] that operates on point clouds to generate candidate grasp locations on the chosen  
 33 object. We filter out grasp locations that are kinematically not reachable by the robot, as well as  
 34 grasp locations located on points that intersect with other objects in the scene. Next, we select the  
 35 top 5 most confident grasps, as estimated by the grasp generator, and choose the most top-down  
 36 grasp. We design an pre-grasp approach pose for the robot which is the same final orientation as  
 37 the grasp, located higher on the grasping plane. The robot moves to the approach pose following a  
 38 minimum-jerk trajectory, and then follows a straight line path along the approach axes to grasp the  
 39 object. Once grasped, the object is moved to the pre-defined place pose and dropped in a drawer.  
 40 The primitives for opening and closing the drawers are manually designed on hardware.

41 The learned policy, conditioned on prompt demonstrations, is applied to two variations of the same  
 42 scene, and the predicted pick actions are executed. Fig.3 shows the captured image from one of  
 43 the three cameras, the merged point cloud and the chosen object to pick and selected grasp for  
 44 the same. The policy was successful once with 100% success rate, and once with 75%, shown in  
 45 Fig.???. The failure case was caused due to a perception error – a bowl was classified as a plate. This  
 46 demonstrates that our approach (TTP) can be trained in simulation and applied directly to hardware.  
 47 The policy is robust to minor hardware errors like a failed grasp; it just measures the new state of the  
 48 environment and chooses the next object to grasp. For example, if the robot fails to grasp a bowl,  
 49 and slightly shifts the bowl, the cameras measure the new pose of the bowl, which is sent to the  
 50 policy. However, TTP relies on accurate perception of the state. If an object is incorrectly classified,  
 51 the policy might choose to pick the wrong object, deviating from the demonstration preference. In  
 52 the future, we would like to further evaluate our approach on more diverse real-world settings and  
 53 measure its sensitivity to the different hardware components, informing future choices for learning  
 54 robust policies.

### 55 A.3 Transforming hardware to simulation data distribution

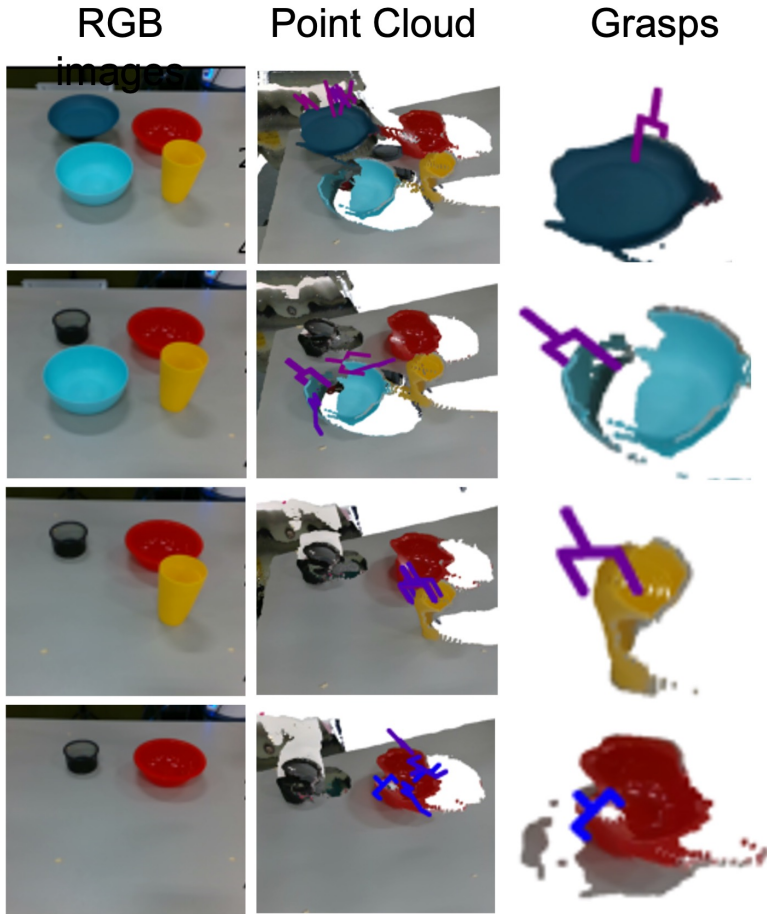

Figure 3: Point cloud and grasps for different objects during policy rollout.

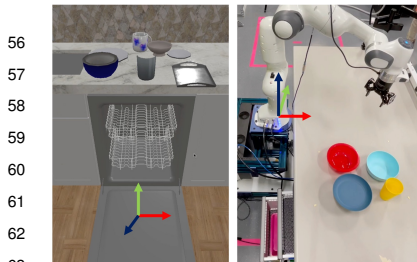

Figure 4: Coordinate Frame of reference in simulation (left) and real world setting (right). Red is x-axis, green is y-axis and blue is z-axis.

the real world coordinates to simulation frame coordinates for running the trained TTP policy on a Franka arm.

We use the semantic work area in simulation and hardware to transform the hardware position coordinates to simulation position coordinates. We measure the extremes of the real workspace by manually moving the robot to record positions and orientations that define the extents of the workspace for the table. The extents of the drawers are measured by placing ARTag markers. We build 3 real-to-sim transformations using the extents for counter, top rack and bottom rack: Let  $X \in \mathbb{R}^{3 \times N}$

The policy trained in simulation applies zero-shot to real-world scenarios, but it requires a coordinate transform. Fig. 4 shows the coordinate frame of reference in simulation and real world setting. Since our instance embedding uses the poses of objects, it is dependant on the coordinate frame that the training data was collected in. Since hardware and simulation are significantly different, this coordinate frame is not the same between sim and real. We build a transformation that converts hardware measured poses to the simulation frame of reference, which is then used to create the instance tokens. This ensures that there is no sim-to-real gap in object positions, reducing the challenges involved in applying such a simulation trained policy to hardware. In this section we describe how we convert

76 contain homogeneous  $xz$ - coordinates of a work area, along its column, as follows:

$$X = \begin{bmatrix} x^{(1)} & x^{(2)} & \dots \\ z^{(1)} & z^{(2)} & \dots \\ 1 & 1 & \dots \end{bmatrix} = [\mathbf{x}^{(1)} \quad \mathbf{x}^{(2)} \quad \dots] \quad (1)$$

77 As the required transformation from real to simulation involves scaling and translation only, we  
 78 have 4 unknowns, namely,  $\mathbf{a} = [\alpha_x, \alpha_y, x_{trans}, z_{trans}]$ . Here  $\alpha_x, \alpha_z$  are scaling factors and  
 79  $x_{trans}, z_{trans}$  are translation offset for  $x$  and  $z$  axis respectively. To solve  $X_{sim} = AX_{hw}$ , we

80 need to find the transformation matrix  $A = \hat{\mathbf{a}} = \begin{bmatrix} \alpha_x & 0 & x_{trans} \\ 0 & \alpha_z & z_{trans} \\ 0 & 0 & 1 \end{bmatrix}$ .

$$X_{sim} = \hat{\mathbf{a}}X_{hw} \quad (2)$$

Rewriting the system of linear equations, (3)

$$\Rightarrow \begin{bmatrix} x_{sim}^{(1)} \\ z_{sim}^{(1)} \\ x_{sim}^{(2)} \\ z_{sim}^{(2)} \\ \vdots \end{bmatrix} = \begin{bmatrix} x_{hw}^{(1)} & 0 & 1 & 0 \\ 0 & z_{hw}^{(1)} & 0 & 1 \\ x_{hw}^{(2)} & 0 & 1 & 0 \\ 0 & z_{hw}^{(2)} & 0 & 1 \\ \vdots & \vdots & \vdots & \vdots \end{bmatrix} \mathbf{a}^T \quad (4)$$

(5)

81 Let the above equation be expressed as  $Y_{sim} = Z_{hw}a^T$  where  $Y_{sim} \in \mathbb{R}^{2N \times 1}$ ,  $Z_{hw} \in \mathbb{R}^{2N \times 4}$ , and  
 82  $a^T \in \mathbb{R}^{4 \times 1}$ . Assuming we have sufficient number of pairs of corresponding points in simulation  
 83 and real world, we can solve for  $\mathbf{a}$  by least squares  $\mathbf{a} = (Z_{hw}^T Z_{hw})^{-1} Z_{hw}^T Y_{sim}$ . The height  $y_{sim}$  is  
 84 chosen from a look-up table based on  $y_{hw}$ . Once we compute the transformation  $A$ , we store it for  
 85 later to process arbitrary coordinates from real to sim, as shown below.

```
def get_simulation_coordinates(xyz_hw: List[float], A: np.array) -> List:
    xz_hw = [xyz_hw[0], xyz_hw[2]]
    X_hw = get_homogenous_coordinates(xz_hw)
    X_sim_homo = np.matmul(A, X_hw)
    y_sim = process_height(xyz_hw[1])
    X_sim = [X_sim_homo[0]/X_sim_homo[2], y_sim, X_sim_homo[1]/X_sim_homo[2]]
    return X_sim
```

86 The objects used in simulation training are different from hardware objects, even though they belong  
 87 to the same categories. For example, while both sim and real have a small plate, the sizes of these  
 88 plates are different. We can estimate the size of the objects based on actual bounding box from the  
 89 segmentation pipeline. However, it is significantly out-of-distribution from the training data, due to  
 90 object mismatch. So, we map each detected object to the nearest matching object in simulation and  
 91 use the simulation size as the input to the policy. This is non-ideal, as the placing might differ for  
 92 sim versus real objects. In the future, we would like to train with rich variations of object bounding  
 93 box size in simulation so that the policy can generalize to unseen object shapes in the real world.

## 94 B Simulation Setup

### 95 B.1 Dataset

96 “Replica Synthetic Apartment 0 Kitchen” consists of a fully-interactive dishwasher with a door and  
 97 two sliding racks, an adjacent counter with a sink, and a “stage” with walls, floors, and ceiling.  
 98 We use selected objects from the ReplicaCAD [8] dataset, including seven types of dishes (cups,  
 99 glasses, trays, small bowls, big bowls, small plates, big plates) which are loaded into the dishwasher.  
 100 Fig. 5 shows a human demonstration recorded in simulation by pointing and clicking on desired

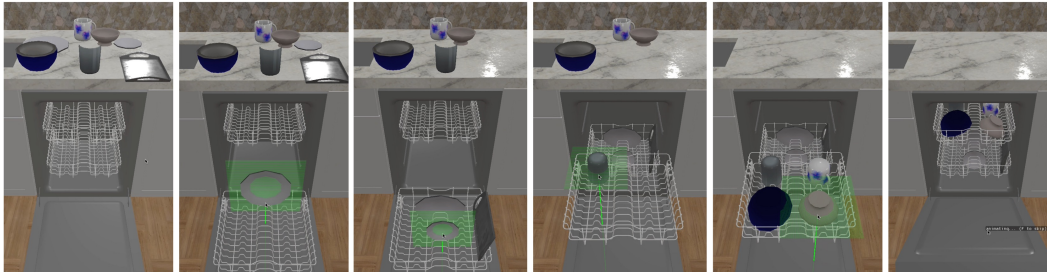

Figure 5: Human demonstration with point and click in simulation

101 object to pick and place. We initialize every scene with an empty dishwasher and random objects  
 102 placed on the counter. Next, we generate dishwasher loading demonstrations, adhering to a given  
 103 preference, using an expert-designed data generation script. Expert actions include, opening/closing  
 104 dishwasher/racks, picking/placing objects in feasible locations or the sink if there are no feasible  
 105 locations left. Experts differ in their preferences, and might choose different object arrangements in  
 106 the dishwasher.

## 107 B.2 Expert Preferences

108 We define a preference in terms of expert demonstration ‘prop-  
 109 erties’, like which rack is loaded first with what objects? There  
 110 are combinatorially many preferences possible, depending on  
 111 how many objects we use in the training set. For example, Ta-  
 112 ble 1 describes the preferences of dishwasher loading in terms  
 113 of three properties - first loaded tray, objects in top and bottom  
 114 tray. Each preference specifies properties such as which rack  
 115 to load first and their contents. In Table 1, Preferences 1 &  
 116 2 vary in the order of which rack is loaded first, while 2 & 3  
 117 both load the bottom rack first with similar categories on top  
 118 and bottom but with different orderings for these categories.  
 119 Other preferences can have different combinations of objects  
 120 loaded per rack.

121 To describe a preference, let there be  $k$  properties, where each  
 122 can take  $m_k$  values respectively. For example, a property to  
 123 describe preference can be which rack is loaded first, and this  
 124 can take two values; either top or bottom rack. The total num-  
 125 ber of possible preferences is  $G = \prod_{i=1}^k m_i$ .

126 In our demonstration dataset, we have 100 unique sessions per preference. Each session can act as  
 127 a prompt to indicate preference as well as provide situation for the policy. Each session is about  
 128  $\sim 30$  steps long. With 7 preferences, this leads to  $70,000 \times 30 = 2,100,000 \sim 2$  million total  
 129 training samples, creating a relatively large training dataset from only 100 unique demonstrations  
 130 per preference.

131 Individual task preferences differ in the sequence of expert actions, but collectively, preferences  
 132 share the underlying task semantics. For example, the user always opens the dishwasher rack be-  
 133 fore loading it for all preferences. By jointly learning over all preferences, our policy can benefit  
 134 from cross-preference data to learn task structure, and sparse per-preference data to learn expert  
 135 preference.

Table 1: Three example preferences for dishwasher loading. Rack order and their respective contents (ordered by preference).

| <i>First?</i> | <i>Top</i>                              | <i>Bottom</i>                                                |
|---------------|-----------------------------------------|--------------------------------------------------------------|
| Top           | 1. cups<br>2. glasses<br>3. small bowl  | 1. big plates<br>2. small plates<br>3. trays<br>4. big bowls |
|               | 1. cups<br>2. glasses<br>3. small bowl  | 1. big plates<br>2. small plates<br>3. trays<br>4. big bowl  |
| Bottom        | 1. small plate<br>2. glasses<br>3. cups | 1. big bowls<br>2. trays<br>3. big plates<br>4. small bowl   |

### 136 B.3 Dynamically appearing objects

137 To add additional complexity to our simulation environment, we simulate a setting with dynami-  
138 cally appearing objects later in the episode. During each session, the scene is initialized with  $p\%$   
139 of maximum objects allowed. The policy/expert starts filling a dishwasher using these initialized  
140 objects. After all the initial objects are loaded and both racks are closed, new objects are initialized  
141 one-per-timestep to the policy. The goal is to simulate an environment where the policy does not  
142 have perfect knowledge of the scene, and needs to reactively reason about new information. The  
143 policy reasons on both object configurations in the racks, and the new object type to decide whether  
144 to ‘open a rack and place the utensil’ or ‘drop the object in the sink’.

## 145 C Training

146 In this Section we describe details of the different components of our learning pipeline.

### 147 C.1 Baseline: GNN

148 **Architecture** We use GNN with attention. The input consists of 12 dimensional attribute inputs  
149 (1D-timestep, 3D-category bounding box extents, 7D-pose, 1D-is object or not?) and 12 dimen-  
150 sional one-hot encoding for the preference.

```
input_dim: 24  
hidden_dim: 128  
epochs: 200  
batch_size: 32
```

151 **Optimizer** : Adam with  $lr = 0.01$  and  $weight\_decay = 1e - 3$ .

152 **Reward function for GNN-RL** Reward function for the RL policy is defined in terms of prefer-  
153 ence. The policy gets a reward of +1 every time it predicts the instance to pick that has the category  
154 according to the preference order and whether it is placed on the preferred rack.

### 155 C.2 Our proposed approach: TTP

156 **Architecture** We use a 2-layer 2-head Transformer network for encoder and decoder. The input  
157 dimension of instance embedding is 256 and the hidden layer dimension is 512. The attributes  
158 contribute to the instance embedding as follows:

```
C_embed: 16  
category_embed_size: 64  
pose_embed_size: 128  
temporal_embed_size: 32  
marker_embed_size: 32
```

159 For the slot attention layer at the head of Transformer encoder, we use:

```
num_slots: 50  
slot_iters: 3
```

160 **Optimizer** We use a batch-size of 64 sequences. Within each batch, we use pad the inputs with 0  
161 upto the max sequence length. Our optimizer of choice is SGD with momentum 0.9, weight decay  
162 0.0001 and dampening 0.1. The initial learning rate is 0.01, with exponential decay of 0.9995 per  
163 10 gradient updates. We used early stopping with patience 100.

### 164 C.3 Metrics

165 In Section 3 , we presented packing efficiency (PE) and edit distance  
 166 (ED) metrics collected on a policy rollout. We present additional metrics  
 167 about training progress and rollout here.

168 **Category-token Accuracy** indicates how well the policy can mimic the  
 169 expert’s action, given the current state. We monitor training progress by  
 170 matching the predicted instance to the target chosen in demonstration  
 171 (Fig. 6). We see that TTP is able to predict the same category object to  
 172 pick perfectly (accuracy close to 1.0). However, this is a simpler setting  
 173 that sequential decision making. During rollout, any error in a state  
 174 could create a setting that is out-of-distribution for the policy. Thus,  
 175 category token accuracy sets an upper bound for rollout performance,  
 176 that is, while having high category token accuracy is necessary, it is not  
 177 sufficient for high packing efficiency and inverse edit distance.

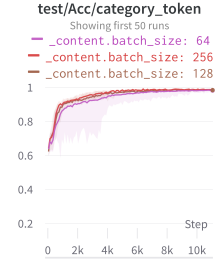

Figure 6: Category level accuracy grouped by batch size for prompt-situation training.

178 **Temporal efficiency:**

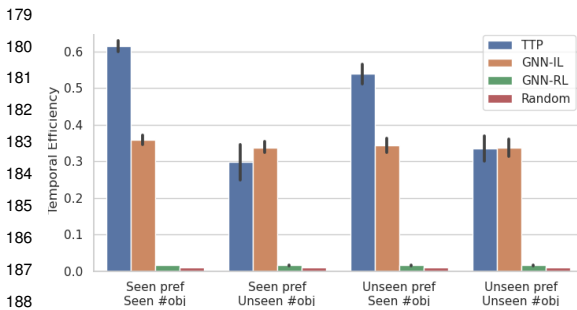

189 Figure 7: TE (SPL) metric for held-out test settings.

190  
 191 between 0 to 1, and higher is better. This value will be equal to or lower than the packing efficiency.  
 192 This especially penalizes policies that present a ‘looping’ behavior, such as repeatedly open/close  
 193 dishwasher trays, over policies that reach a low PE in shorter episodes (for example, by placing  
 194 most objects in the sink). Fig 7 shows the temporal efficiency or SPL over our 4 main held-out test  
 195 settings.

196 **D Additional Ablation Experiments**

197 In Section ?? we presented ablation experiments over number of demonstrations per preference  
 198 used for training, and the number of unique preferences used. In this Section, we present additional  
 199 ablation experiments over the design of instance encodings in TTP. Additionally, we also present  
 200 results where we increase the temporal context of TTP and study its effect on performance.

201 **D.1 Design of Instance Encoding**

202 **How much does temporal encoding design matter?** Fig. 8a shows that learning an embedding  
 203 per timestep or expanding it as fourier transformed vector of sufficient size achieves high success.  
 204 On the other hand, having no timestep input shows slightly lower performance. Timestep helps in  
 205 encoding the order of the prompt states. The notion of timestep is also incorporated by autoregres-  
 206 sive masking in both the encoder and the decoder.

207 **How much does category encoding design matter?** In our work, we represent category as the  
 208 extents of an objects’ bounding box. An alternative would be to denote the category as a discrete  
 209 set of categorical labels. Intuitively, bounding box extents captures shape similarity between objects  
 210 and their placement implicitly, which discrete category labels do not. Fig. 8b shows that fourier  
 211 transform of the bounding box achieves better performance than discrete labels, which exceeds the  
 212 performance with no category input.

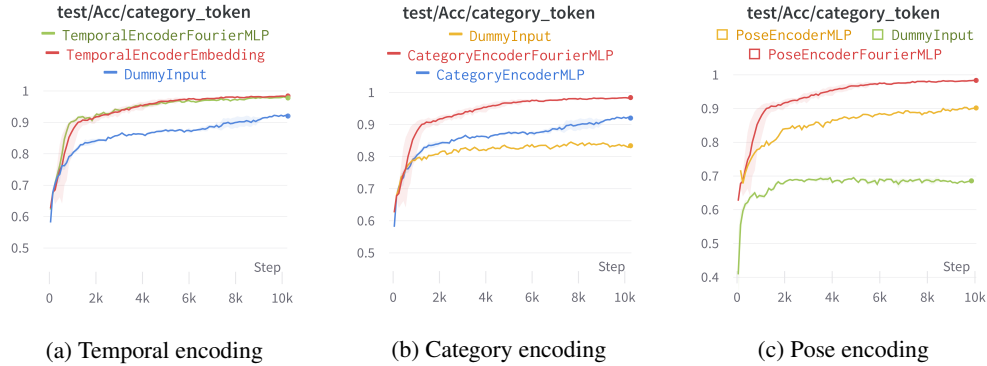

Figure 8: [Left-to-Right] Comparing different design choices of attribute encoders in terms of category token accuracy on held-out test prompt-situation session pairs.

213 **How much does pose encoding design matter?** We encode pose as a 7-dim vector that includes  
 214 3d position and 4d quaternion. Fig. 8c shows that the fourier transform of the pose encoding  
 215 performs better than feeding the 7 dim through MLP. Fourier transform of the pose performs better  
 216 because such a vector encodes the fine and coarse nuances appropriately, which otherwise either  
 217 require careful scaling or can be lost during SGD training.

## 218 D.2 Markov assumption on the current state in partial visibility scenarios

219 Dynamic settings, as used in our simulation, can be  
 220 partially observable. For example, when the rack is  
 221 closed, the policy doesn't know whether it is full or  
 222 not from just the current state. If a new object ar-  
 223 rives, the policy needs to decide between opening  
 224 the rack if there is space, or dropping the object in  
 225 sink if the rack is full. In such partially observed set-  
 226 tings, the current state may or may not contain all the  
 227 information needed to reason about the next action.  
 228 However, given information from states in previous  
 229 timesteps, the policy can decide what action to take  
 230 (whether to open the rack or directly place the ob-  
 231 ject in the sink). With this in mind, we train a single  
 232 preference pick only policy for different context his-  
 233 tory. As shown in Fig. 10, context window of size  $k$   
 234 processes the current state as well as  $k$  predecessor  
 235 states, that is, in total  $k + 1$  states.

236 Let context history  $k$  refer to the number of previous  
 237 states included in the input. Then the input is a se-  
 238 quence of previous  $k$  states' instances (including the  
 239 current state), as shown in Fig. 10.

240 Fig 9 shows that TTP gets  $> 90\%$  category level prediction accuracy in validation for all context  
 241 windows. While larger context windows result in faster learning at the start of the training, the  
 242 asymptotic performance of all contexts is the same. This points to the dataset being largely visible,  
 243 and a single context window capturing the required information. In the future, we would like to  
 244 experiment with more complex settings like mobile robots, which might require a longer context.

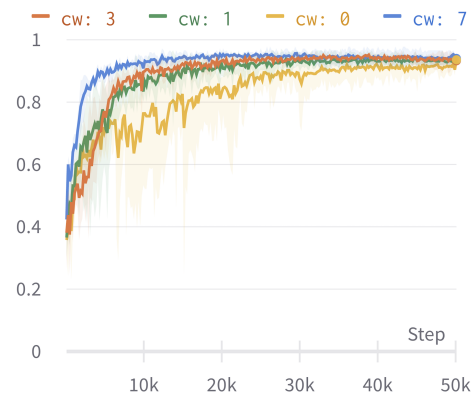

Figure 9: Plot showing category level accuracy for the held-out test sessions for single preference training with context windows. While larger context window size learns faster, the asymptotic performance for all context windows converges in our setting.



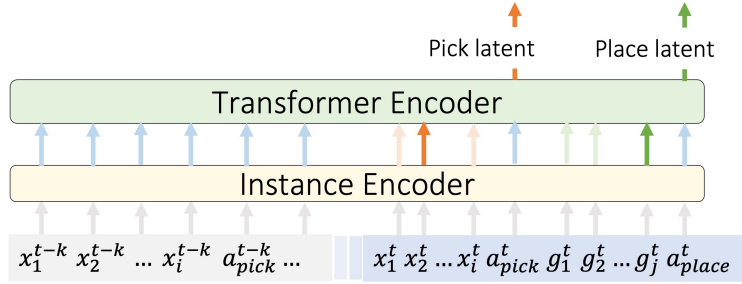

Figure 10: Processing with previous Context History  $k$

## 245 E Limitations and Future scope

246 In Section 6, we briefly discussed the limitations and risks. Here we enlist more details and highlight  
 247 future directions.

248 **Pick grasping depends on accurate segmentation and edge detection** Grasping policy depends  
 249 on quality of segmentation and edge detection of the selected object. Due to noise in calibration,  
 250 shadows and reflections, there are errors in detecting the correct edge to successfully grasp the  
 251 object. For example, it is hard to grasp a plate in real setting. Plate is very close to the ground and  
 252 the depth cameras cannot detect a clean edge for grasping. Therefore, in our work, we place the  
 253 plate on an elevated stand for easy grasping. Grasping success also depends on the size and kind of  
 254 gripper used.

255 **Placement in real setting** For placement, the orientation of final pose is often different from  
 256 initial pose and may require re-grasping. The placement pose at final settlement is different from the  
 257 robot’s end-effector pose while releasing the object from its grasp. Similar to picking, placement  
 258 accuracy will largely depend on appropriate size and shape of gripper used. Due to these reasons,  
 259 placement in real world is an open challenging problem and we hope to address this future work.

260 **Hardware pipeline issues due to calibration** The resulting point cloud is generated noisy due to  
 261 two reasons. First, incorrect depth estimation due to camera hardware, lighting conditions, shadows  
 262 and reflections. Second, any small movements among cameras that affects calibration. If we have  
 263 a noisy point cloud, it is more likely to have errors in subsequent segmentation and edge detection  
 264 for grasp policy. Having sufficient coverage of the workspace with cameras is important to mitigate  
 265 issues due to occlusions and incomplete point clouds.

266 **Incomplete information in prompt** The prompt session may not contain all the information to  
 267 execute on the situation. For example, in a prompt session there might be no large plates seen, which  
 268 is incomplete/ambiguous information for the policy. This can be mitigated by ensuring complete  
 269 information in prompt demo or having multiple prompts in slightly different initialization.

270 **References**

- 271 [1] L. Keselman, J. Iselin Woodfill, A. Grunnet-Jepsen, and A. Bhowmik. Intel realsense stereo-  
272 scopic depth cameras. In *Proceedings of the IEEE conference on computer vision and pattern*  
273 *recognition workshops*, pages 1–10, 2017.
- 274 [2] M. Fiala. Artag, a fiducial marker system using digital techniques. In *2005 IEEE Computer*  
275 *Society Conference on Computer Vision and Pattern Recognition (CVPR'05)*, volume 2, pages  
276 590–596. IEEE, 2005.
- 277 [3] Q.-Y. Zhou, J. Park, and V. Koltun. Open3d: A modern library for 3d data processing. *arXiv*  
278 *preprint arXiv:1801.09847*, 2018.
- 279 [4] Y. Xiang, C. Xie, A. Mousavian, and D. Fox. Learning rgb-d feature embeddings for unseen  
280 object instance segmentation. *arXiv preprint arXiv:2007.15157*, 2020.
- 281 [5] K. He, G. Gkioxari, P. Dollár, and R. Girshick. Mask r-cnn. In *Proceedings of the IEEE*  
282 *international conference on computer vision*, pages 2961–2969, 2017.
- 283 [6] Y. Lin, A. S. Wang, G. Sutanto, A. Rai, and F. Meier. Polymetis. [https://](https://facebookresearch.github.io/fairo/polymetis/)  
284 [facebookresearch.github.io/fairo/polymetis/](https://facebookresearch.github.io/fairo/polymetis/), 2021.
- 285 [7] H.-S. Fang, C. Wang, M. Gou, and C. Lu. Graspnet-1billion: A large-scale benchmark for  
286 general object grasping. In *Proceedings of the IEEE/CVF conference on computer vision and*  
287 *pattern recognition*, pages 11444–11453, 2020.
- 288 [8] A. Szot, A. Clegg, E. Undersander, E. Wijmans, Y. Zhao, J. Turner, N. Maestre, M. Mukadam,  
289 D. Chaplot, O. Maksymets, A. Gokaslan, V. Vondrus, S. Dharur, F. Meier, W. Galuba, A. Chang,  
290 Z. Kira, V. Koltun, J. Malik, M. Savva, and D. Batra. Habitat 2.0: Training home assistants to  
291 rearrange their habitat. In *Advances in Neural Information Processing Systems (NeurIPS)*, 2021.
- 292 [9] P. Anderson, A. Chang, D. S. Chaplot, A. Dosovitskiy, S. Gupta, V. Koltun, J. Kosecka, J. Malik,  
293 R. Mottaghi, M. Savva, et al. On evaluation of embodied navigation agents. *arXiv preprint*  
294 *arXiv:1807.06757*, 2018.
